# Supplementary material
Source: PubMed Central journal article supplement (PMC3886373)
Supplement: NIHMS541438-supplement-1_si_001.pdf [file NIHMS541438-supplement-1_si_001.pdf]

Table S1: RNA Duplex Dodecamer Unfolding Enthalpies  $\Delta H_{\text{obs}}^{\circ}$  (kcal mol<sup>-1</sup>) from Thermal Denaturation Monitored by uv-Absorbance Spectroscopy as a Function of Glycine Betaine Molality<sup>a</sup>

| Sequence              | %GC | 0 molal     | 0.5 molal   | 1 molal     | 1.5 molal   | 2 molal     |
|-----------------------|-----|-------------|-------------|-------------|-------------|-------------|
| 5'-r(GAAAUUAUAAAG)-3' | 17  | 84.4 ± 4.0  | 85.0 ± 5.1  | 86.9 ± 3.9  | 86.2 ± 4.3  | 86.6 ± 4.0  |
| 5'-r(GAAAGUAUAAAG)-3' | 25  | 84.1 ± 2.9  | 84.2 ± 2.7  | 85.7 ± 4.3  | 88.1 ± 3.2  | 83.5 ± 4.0  |
| 5'-r(GAUAGUAGAUAG)-3' | 33  | 91.6 ± 5.0  | 95.1 ± 4.9  | 97.9 ± 3.8  | 99.1 ± 3.7  | 100.3 ± 4.5 |
| 5'-r(GAAAGUAGAAAC)-3' | 33  | 89.9 ± 3.4  | 87.8 ± 3.8  | 93.4 ± 3.9  | 100.0 ± 2.6 | 102.1 ± 3.7 |
| 5'-r(GCAAAGUAAACG)-3' | 42  | 86.6 ± 5.0  | 86.6 ± 4.0  | 89.7 ± 3.3  | 94.1 ± 4.5  | 94.3 ± 4.2  |
| 5'-r(GCAAAGCAAACG)-3' | 50  | 93.7 ± 4.9  | 97.5 ± 4.6  | 103.6 ± 4.0 | 101.3 ± 3.3 | 105.2 ± 3.7 |
| 5'-r(GCAUAGCAUACG)-3' | 50  | 97.3 ± 4.1  | 97.1 ± 3.4  | 103.1 ± 3.9 | 104.6 ± 3.4 | 109.9 ± 4.1 |
| 5'-r(GCGAAGCCAACG)-3' | 67  | 85.7 ± 4.1  | 87.0 ± 3.7  | 91.7 ± 3.9  | 100.4 ± 4.3 | 105.5 ± 3.3 |
| 5'-r(GCGCCGCCGGCG)-3' | 100 | 105.4 ± 3.6 | 114.6 ± 2.3 | 120.7 ± 4.2 | 119.1 ± 3.2 | 121.2 ± 3.9 |

<sup>a</sup>Enthalpies represent averages of duplicate or triplicate measurements. Enthalpy standard errors determined by propagating errors from separate unfolding trials.

Table S2: RNA Duplex Dodecamer Concentration-Normalized Transition Region Hyperchromicity ( $\mu M^{-1}$ ) as a Function of Glycine Betaine Molality<sup>a</sup>

| Sequence              | %GC | 0 molal       | 0.5 molal     | 1 molal       | 1.5 molal     | 2 molal       |
|-----------------------|-----|---------------|---------------|---------------|---------------|---------------|
| 5'-r(GAAAUUAUAAAG)-3' | 17  | 0.050 ± 0.001 | 0.050 ± 0.001 | 0.052 ± 0.001 | 0.051 ± 0.004 | 0.052 ± 0.001 |
| 5'-r(GAAAGUAUAAAG)-3' | 25  | 0.050 ± 0.001 | 0.049 ± 0.001 | 0.050 ± 0.001 | 0.050 ± 0.003 | 0.052 ± 0.001 |
| 5'-r(GAUAGUAGAUAG)-3' | 33  | 0.050 ± 0.001 | 0.049 ± 0.001 | 0.050 ± 0.001 | 0.050 ± 0.001 | 0.050 ± 0.002 |
| 5'-r(GAAAGUAGAAAC)-3' | 33  | 0.047 ± 0.001 | 0.051 ± 0.001 | 0.052 ± 0.003 | 0.051 ± 0.003 | 0.053 ± 0.002 |
| 5'-r(GCAAAGUAAACG)-3' | 42  | 0.046 ± 0.001 | 0.046 ± 0.002 | 0.044 ± 0.001 | 0.051 ± 0.001 | 0.046 ± 0.003 |
| 5'-r(GCAAAGCAAACG)-3' | 50  | 0.046 ± 0.001 | 0.051 ± 0.001 | 0.050 ± 0.003 | 0.051 ± 0.002 | 0.050 ± 0.001 |
| 5'-r(GCAUAGCAUACG)-3' | 50  | 0.044 ± 0.001 | 0.049 ± 0.001 | 0.047 ± 0.001 | 0.049 ± 0.001 | 0.055 ± 0.001 |
| 5'-r(GCGAAGCCAACG)-3' | 67  | 0.035 ± 0.001 | 0.040 ± 0.001 | 0.040 ± 0.001 | 0.041 ± 0.004 | 0.042 ± 0.003 |
| 5'-r(GCGCCGCCGGCG)-3' | 100 | 0.023 ± 0.002 | 0.028 ± 0.001 | 0.026 ± 0.002 | 0.027 ± 0.001 | 0.031 ± 0.001 |

<sup>a</sup>Hyperchromicities represent averages of duplicate or triplicate measurements. Standard errors determined by propagating errors from separate unfolding trials.

Table S3: Change in Solvent Accessible Surface Area ( $\Delta$ ASA) Values for RNA Duplex Dodecamers Assuming Stacked Nucleobases in Single Strands

| sequence               | %GC | total $\Delta$ ASA/ $\text{\AA}^2$ | anionic oxygen $\Delta$ ASA/ $\text{\AA}^2$ | sugar $\Delta$ ASA/ $\text{\AA}^2$ | base aromatic $\Delta$ ASA/ $\text{\AA}^2$ | base amine $\Delta$ ASA/ $\text{\AA}^2$ | amide-like oxygen $\Delta$ ASA/ $\text{\AA}^2$ | aliphatic base $\Delta$ ASA/ $\text{\AA}^2$ |
|------------------------|-----|------------------------------------|---------------------------------------------|------------------------------------|--------------------------------------------|-----------------------------------------|------------------------------------------------|---------------------------------------------|
| 5'-r(GAAAUUUAUAAAG)-3' | 17  | 1112                               | 0                                           | 5                                  | 523                                        | 330                                     | 302                                            | 0                                           |
| 5'-r(GAAAGUAUAAAG)-3'  | 25  | 1130                               | 0                                           | 8                                  | 506                                        | 350                                     | 307                                            | 0                                           |
| 5'-r(GAUAGUAGAUAG)-3'  | 33  | 1159                               | 0                                           | 11                                 | 481                                        | 425                                     | 277                                            | 0                                           |
| 5'-r(GAAAGUAGAAAC)-3'  | 33  | 1113                               | 0                                           | 8                                  | 472                                        | 346                                     | 331                                            | 0                                           |
| 5'-r(GCAAAGUAAACG)-3'  | 42  | 1174                               | 0                                           | 14                                 | 493                                        | 367                                     | 310                                            | 0                                           |
| 5'-r(GCAAAGCAAACG)-3'  | 50  | 1192                               | 0                                           | 17                                 | 481                                        | 380                                     | 306                                            | 0                                           |
| 5'-r(GCAUAGCAUACG)-3'  | 50  | 1216                               | 0                                           | 17                                 | 479                                        | 448                                     | 255                                            | 0                                           |
| 5'-r(GCGAAGCCAACG)-3'  | 67  | 1224                               | 0                                           | 23                                 | 440                                        | 437                                     | 309                                            | 0                                           |
| 5'-r(GCGCCGCCGCG)-3'   | 100 | 1301                               | 0                                           | 35                                 | 385                                        | 527                                     | 300                                            | 0                                           |

Table S4: Change in Solvent Accessible Surface Area ( $\Delta$ ASA) Values for RNA Duplex Dodecamers Assuming Half-Stacked Nucleobases in Single Strands

| sequence               | %GC | total $\Delta$ ASA/ $\text{\AA}^2$ | anionic oxygen $\Delta$ ASA/ $\text{\AA}^2$ | sugar $\Delta$ ASA/ $\text{\AA}^2$ | base aromatic $\Delta$ ASA/ $\text{\AA}^2$ | base amine $\Delta$ ASA/ $\text{\AA}^2$ | amide-like oxygen $\Delta$ ASA/ $\text{\AA}^2$ | aliphatic base $\Delta$ ASA/ $\text{\AA}^2$ |
|------------------------|-----|------------------------------------|---------------------------------------------|------------------------------------|--------------------------------------------|-----------------------------------------|------------------------------------------------|---------------------------------------------|
| 5'-r(GAAAUUUAUAAAG)-3' | 17  | 2322                               | -174                                        | 166                                | 1266                                       | 586                                     | 480                                            | 0                                           |
| 5'-r(GAAAGUAUAAAG)-3'  | 25  | 2350                               | -174                                        | 171                                | 1239                                       | 623                                     | 491                                            | 0                                           |
| 5'-r(GAUAGUAGAUAG)-3'  | 33  | 2383                               | -174                                        | 177                                | 1210                                       | 687                                     | 485                                            | 0                                           |
| 5'-r(GAAAGUAGAAAC)-3'  | 33  | 2363                               | -176                                        | 172                                | 1206                                       | 661                                     | 502                                            | 0                                           |
| 5'-r(GCAAAGUAAACG)-3'  | 42  | 2406                               | -174                                        | 181                                | 1199                                       | 684                                     | 517                                            | 0                                           |
| 5'-r(GCAAAGCAAACG)-3'  | 50  | 2432                               | -176                                        | 185                                | 1177                                       | 717                                     | 530                                            | 0                                           |
| 5'-r(GCAUAGCAUACG)-3'  | 50  | 2443                               | -176                                        | 184                                | 1177                                       | 752                                     | 508                                            | 0                                           |
| 5'-r(GCGAAGCCAACG)-3'  | 67  | 2432                               | -167                                        | 186                                | 1095                                       | 788                                     | 532                                            | 0                                           |
| 5'-r(GCGCCGCCGCG)-3'   | 100 | 2596                               | -176                                        | 216                                | 1026                                       | 949                                     | 582                                            | 0                                           |

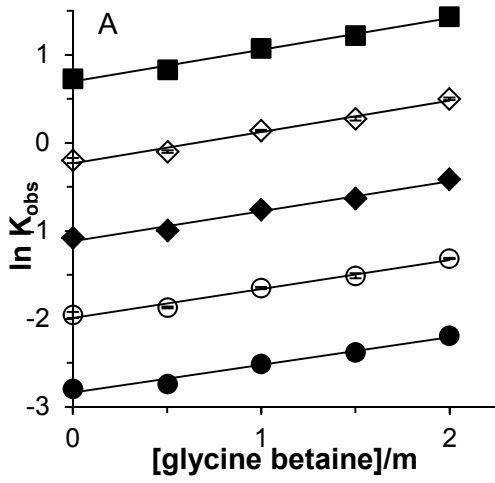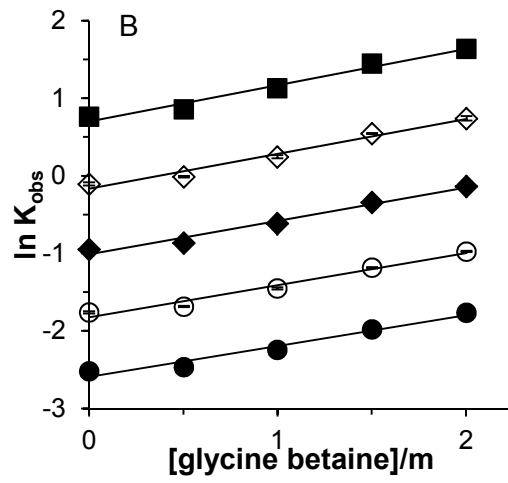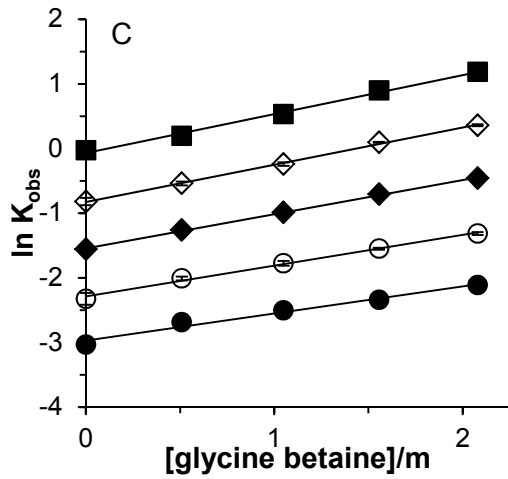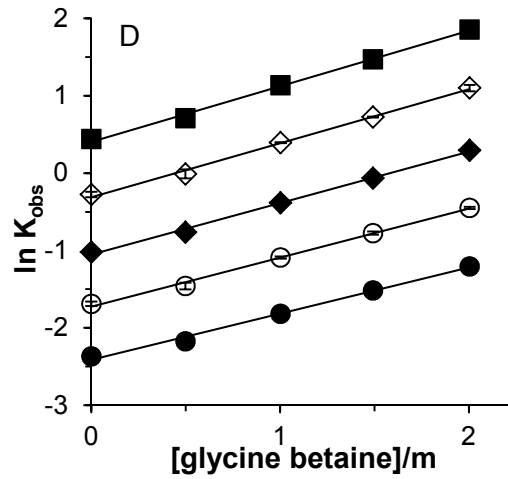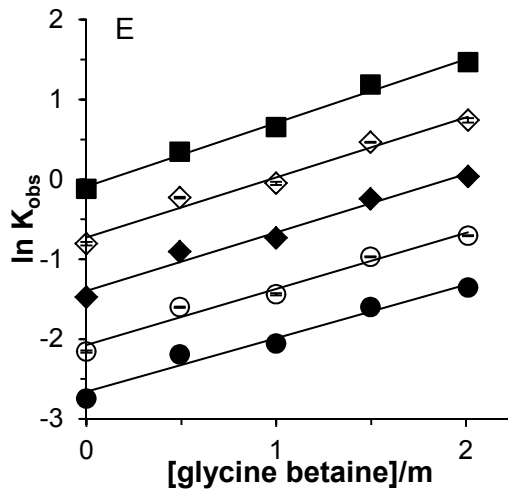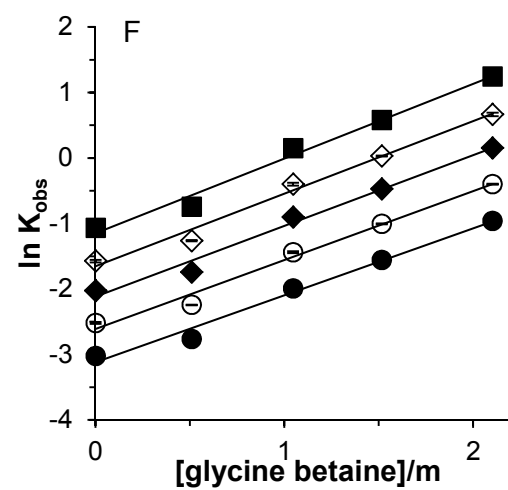

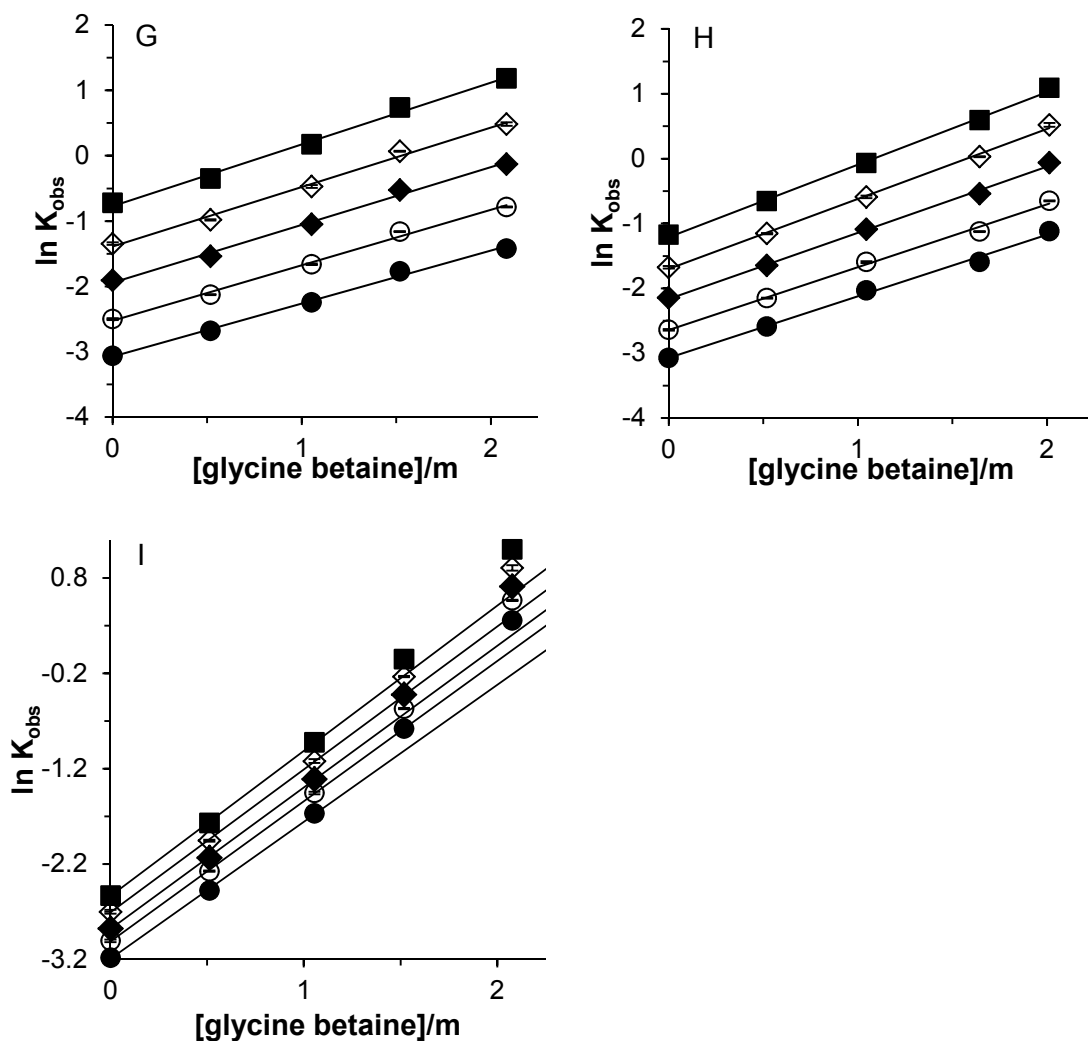

Figure S1. Natural logarithm of the observed unfolding equilibrium constant  $K_{\text{obs}}$  for thermal denaturation of RNA duplexes as a function of glycine betaine molality and temperature. The temperature at a fraction of unfolded duplex of 0.2 is given by filled circles and a fraction of unfolded duplex of 0.8 is given by filled squares. Temperatures in between these two temperatures follow the progression open diamonds > filled diamonds > open circles. A) 5'-r(GAAAUAUAAAG)-3' at 27.3, 29.2, 31.1, 33.0, and 35.0 °C; B) 5'-r(GAAAGUAUAAAG)-3' at 34.8, 36.7, 38.6, 40.5, and 42.4 °C; C) 5'-r(GAAAGUAGAAAC)-3' at 40.4, 42.0, 43.7, 45.3, and 46.9 °C; D) 5'-r(GAUAGUAGAUAG)-3' at 45.5, 47.1, 48.6, 50.2, and 51.7 °C; E) 5'-r(GCAAAGUAAACG)-3' at 44.6, 46.1, 47.7, 49.2, and 50.7 °C; F) 5'-r(GCAAAGCAAACG)-3' at 49.0, 50.1, 51.2, 52.2, and 53.3 °C; G) 5'-r(GCAUAGCAUACG)-3' at 52.0, 53.3, 54.6, 55.8, and 57.1 °C; H) 5'-r(GCGAAGCCAACG)-3' at 59.6, 60.8, 62.1, 63.3, and 64.5 °C; I) 5'-r(GCGCCGCCGCG)-3' at 80.9, 81.3, 81.6, 82.0, and 82.4 °C. Linear regression slopes are equal to  $-\Delta\mu_{23,4}/RT$ . For the 5'-r(GCGCCGCCGCG)-3' duplex, only the first three data points were used in the regression analysis. Error bars on  $\ln K_{\text{obs}}$  are smaller than symbols.

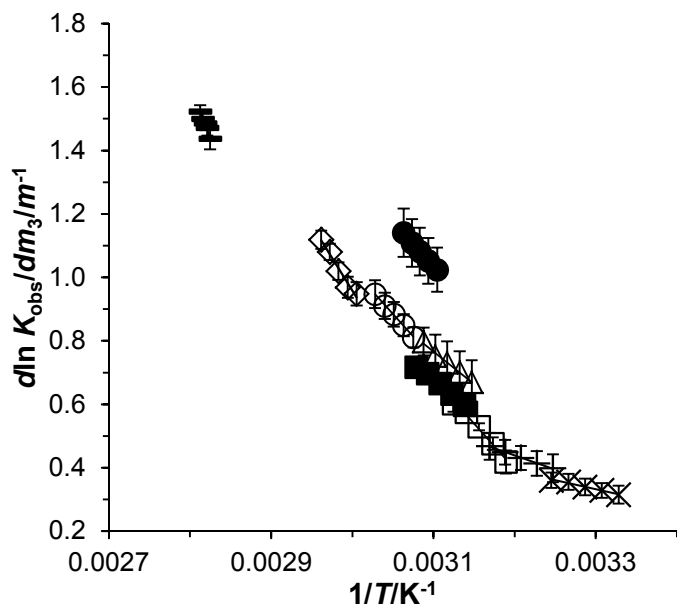

Figure S2. RNA duplex  $d \ln K_{\text{obs}}/dm_3$  as a function of inverse temperature. 5'-r(GAAAUUAUAAAG)-3' (crosses), 5'-r(GAAAGUAUAAAG)-3' (plus symbols), 5'-r(GAUAGUAGAUAG)-3' (filled squares), 5'-r(GAAAGUAGAAAC)-3' (open squares), 5'-r(GCAAAGUAAACG)-3' (open triangles), 5'-r(GCAAAGCAAACG)-3' (filled circles), 5'-r(GCAUAGCAUACG)-3' (open circles), 5'-r(GCGAAGCCAACG)-3' (open diamonds), 5'-r(GCGCCGCCGGCG)-3' (dash). Slopes from linear regression are equal to  $d^2 \ln K_{\text{obs}}/dm_3 d(1/T) = -d\Delta H_{\text{obs}}^{\circ}/dm_3 \times 1/R$ .
